# Supplementary material for: LongStitch: high-quality genome assembly correction and scaffolding using long reads
Source: PubMed Central journal article supplement (PMC8557608; doi:10.1186/s12859-021-04451-7), 2021-10-30
Supplement: 12859_2021_4451_MOESM1_ESM.pdf [file 12859_2021_4451_MOESM1_ESM.pdf]

# LongStitch – High-quality genome assembly correction and scaffolding using long reads

Lauren Coombe\*, Janet X Li\*, Theodora Lo\*, Johnathan Wong, Vladimir Nikolic, René L Warren, Inanc Birol

\* Joint first authors

## Additional File 1

### Table of Contents

|                                                                                                                                                      |    |
|------------------------------------------------------------------------------------------------------------------------------------------------------|----|
| Table S1. Sequencing data used for the correction and scaffolding runs. ....                                                                         | 3  |
| Table S2. Baseline assemblies used for correction and scaffolding runs. ....                                                                         | 4  |
| Table S3. Availability of baseline assemblies used for correction and scaffolding runs. ....                                                         | 5  |
| Table S4. Reference genome builds used for QAST assembly analysis.....                                                                               | 6  |
| Table S5. Contiguity, correctness and benchmarking statistics for running the default steps of LongStitch (up to ntLink) on human assemblies. ....   | 6  |
| Table S6. Contiguity, correctness and benchmarking statistics for running LRScf on human assemblies. ....                                            | 7  |
| Table S7. Contiguity, correctness and benchmarking statistics for running OPERA-LG on human assemblies. ....                                         | 7  |
| Table S8. Contiguity, correctness and benchmarking statistics for running LongStitch, LRScf and OPERA-LG on <i>C. elegans</i> assemblies.....        | 8  |
| Table S9. Contiguity, correctness and benchmarking statistics for running LongStitch, LRScf and OPERA-LG on <i>O. sativa</i> assemblies.....         | 9  |
| Table S10. Positive predictive value (PPV) and true positive rate (TPR) of Tigmint-long.....                                                         | 10 |
| Table S11. Contiguity, correctness and benchmarking statistics for running LongStitch including the optional ARKS-long step on human assemblies..... | 11 |
| Table S12. Summarizing the number of matching minimizers per ntLink-joined contig pair. ....                                                         | 11 |
| Figure S1. Schematic describing the gap size estimation algorithm in ntLink.....                                                                     | 12 |
| Figure S2. Contiguity and correctness statistics of assemblies improved using LRScf with different parameter combinations and LongStitch. ....       | 13 |
| Figure S3. Jupiter consistency plots showing the contiguity and correctness of LongStitch and LRScf assemblies. ....                                 | 14 |

Figure S4. Benchmarking results of improving assemblies with LongStitch, LRScf or OPERA-LG. .... 16

Figure S5. Contiguity and correctness results for running each step of the LongStitch pipeline, including the optional ARKS-long step, LRScf and OPERA-LG on human assemblies. .... 17

Figure S6. Benchmarking results for running LRScf and the LongStitch pipeline including the optional ARKS-long step on human assemblies. .... 18

Figure S7. Time breakdown for each of the steps in LongStitch, including the optional ARKS-long step, and LRScf. .... 19

Figure S8. Contiguity and correctness results from sweeping on the ntLink  $k$  and  $w$  parameters for the default steps of LongStitch. .... 20

Figure S9. Benchmarking results from sweeping on the ntLink  $k$  and  $w$  parameters for the default steps of LongStitch. .... 21

## Supplementary Tables

**Table S1. Sequencing data used for the correction and scaffolding runs.**

| Species           | Individual/<br>Strain | Reads<br>type | Fold<br>coverage | Platform                           | Accession(s)/Source                                                                                                                         |
|-------------------|-----------------------|---------------|------------------|------------------------------------|---------------------------------------------------------------------------------------------------------------------------------------------|
| <i>H. sapiens</i> | NA12878               | Short         | 54               | Illumina HiSeq                     | Illumina basespace – run title: “HiSeq 2500: TruSeq PCR-Free DNA 2x251 (NA12878)”                                                           |
| <i>H. sapiens</i> | NA12878               | MPET          | N/A              | Illumina HiSeq                     | ERR262997                                                                                                                                   |
| <i>H. sapiens</i> | NA12878               | Long          | 39               | ONT                                | SRR10965087                                                                                                                                 |
| <i>H. sapiens</i> | NA19240               | Short         | 62               | Illumina HiSeq                     | SRR3189758, SRR3189759                                                                                                                      |
| <i>H. sapiens</i> | NA19240               | Long          | 49               | ONT                                | ERR3219854, ERR3219857                                                                                                                      |
| <i>H. sapiens</i> | NA24385               | Short         | 58               | Illumina HiSeq                     | SRR11321732                                                                                                                                 |
| <i>H. sapiens</i> | NA24385               | Long          | 51               | ONT                                | s3://ont-open-data/gm24385_2020.11/analysis/r9.4.1/20201026_1644_2-E5-H5_PAG07162_d7f262d5/guppy_v4.0.11_r9.4.1_hac_prom/basecalls.fastq.gz |
| <i>C. elegans</i> | N2                    | Short         | 75               | Illumina<br>Genome<br>Analyzer Iix | DRR008444                                                                                                                                   |
| <i>C. elegans</i> | N2                    | Long          | 40               | ONT                                | ERR2092776 (randomly subsampled to 40x)                                                                                                     |
| <i>O. sativa</i>  | Japonica<br>group     | Short         | 67               | Illumina<br>NovaSeq                | SRR10567117                                                                                                                                 |
| <i>O. sativa</i>  | Japonica<br>group     | Long          | 63               | ONT                                | SRR10589512-SRR10589711                                                                                                                     |

ONT: Oxford Nanopore Technologies

MPET: Mate-pair sequencing reads

**Table S2. Baseline assemblies used for correction and scaffolding runs.** ‘n’ is the number of contigs over 3 kbp. Default parameters were used for the assemblers, with the exception of the parameters listed.

| Species           | Individual     | Assembly reads | Assembler                  | Parameters                        | n       | NG50 (bp) | NGA50 (bp) | Largest contig (bp) | Number of extensive misassemblies | Local misassemblies |
|-------------------|----------------|----------------|----------------------------|-----------------------------------|---------|-----------|------------|---------------------|-----------------------------------|---------------------|
| <i>H. sapiens</i> | NA12878        | Short + MPET   | ABYSS 2.1.5                | k=128, kc=3, B=115G, j=24         | 6,656   | 1,175,297 | 1,131,267  | 7,807,150           | 462                               | 7,589               |
| <i>H. sapiens</i> | NA12878        | Long           | Shasta 0.5.1               | --threads 48                      | 3,596   | 2,617,486 | 2,346,570  | 17,057,497          | 533                               | 5,184               |
| <i>H. sapiens</i> | NA19240        | Short          | ABYSS 2.2.3                | k=112, kc=3, B=150G, j=48, N=5-20 | 190,813 | 14,618    | 14,512     | 202,526             | 969                               | 951                 |
| <i>H. sapiens</i> | NA19240        | Long           | Shasta 0.5.1               | --threads 48                      | 4,316   | 2,389,148 | 2,213,238  | 13,988,698          | 526                               | 6,516               |
| <i>H. sapiens</i> | NA24385        | Short          | ABYSS 2.2.3                | k=112, kc=3, B=150G, j=48, N=5-20 | 44,555  | 102,102   | 97,340     | 1,078,380           | 2,024                             | 1,077               |
| <i>H. sapiens</i> | NA24385        | Long           | Shasta 0.5.1               | --threads 48                      | 4,268   | 5,734,421 | 4,876,524  | 30,135,269          | 768                               | 4,054               |
| <i>C. elegans</i> | N2 strain      | Short          | ABYSS 2.1.4                | k=64, kc=3, B=10G, j=8            | 4552    | 30,293    | 27,037     | 339,951             | 448                               | 89                  |
| <i>C. elegans</i> | N2 strain      | Long           | Shasta 0.5.1               | --threads 48                      | 299     | 1,385,395 | 783,719    | 5,326,010           | 69                                | 1,021               |
| <i>O. sativa</i>  | Japonica group | Short          | ABYSS 2.2.3                | k=112, kc=2, B=50G, j=48          | 16,257  | 22,852    | 20,545     | 225,597             | 1,407                             | 1,015               |
| <i>O. sativa</i>  | Japonica group | Long           | Canu*<br>(GCA_002573525.1) | N/A                               | 588     | 2,733,017 | 1,173,940  | 10,356,529          | 2,424                             | 2,700               |

\* Downloaded from NCBI with specified accession. To generate assembly, Nie, SJ, *et al* (2017) assembled PacBio reads using Canu, then polished the assembly using Pilon.

**Table S3. Availability of baseline assemblies used for correction and scaffolding runs.**

| Species           | Individual/<br>Strain | Assembly<br>reads | Assembler       | URL                                                                                                                                                                                                                                             |
|-------------------|-----------------------|-------------------|-----------------|-------------------------------------------------------------------------------------------------------------------------------------------------------------------------------------------------------------------------------------------------|
| <i>H. sapiens</i> | NA12878               | Short +<br>MPET   | ABySS<br>2.1.5  | <a href="https://www.bcgsc.ca/downloads/btl/LongStitch/baseline_assemblies/NA12878/abyss/NA12878.abyss-mpet.fa.gz">https://www.bcgsc.ca/downloads/btl/LongStitch/baseline_assemblies/NA12878/abyss/NA12878.abyss-mpet.fa.gz</a>                 |
| <i>H. sapiens</i> | NA12878               | Long              | Shasta<br>0.5.1 | <a href="https://www.bcgsc.ca/downloads/btl/LongStitch/baseline_assemblies/NA12878/shasta/NA12878.shasta-polished.fa.gz">https://www.bcgsc.ca/downloads/btl/LongStitch/baseline_assemblies/NA12878/shasta/NA12878.shasta-polished.fa.gz</a>     |
| <i>H. sapiens</i> | NA19240               | Short             | ABySS<br>2.2.3  | <a href="https://www.bcgsc.ca/downloads/btl/LongStitch/baseline_assemblies/NA19240/abyss/NA19240.abyss.fa.gz">https://www.bcgsc.ca/downloads/btl/LongStitch/baseline_assemblies/NA19240/abyss/NA19240.abyss.fa.gz</a>                           |
| <i>H. sapiens</i> | NA19240               | Long              | Shasta<br>0.5.1 | <a href="https://www.bcgsc.ca/downloads/btl/LongStitch/baseline_assemblies/NA19240/shasta/NA19240.shasta-polished.fa.gz">https://www.bcgsc.ca/downloads/btl/LongStitch/baseline_assemblies/NA19240/shasta/NA19240.shasta-polished.fa.gz</a>     |
| <i>H. sapiens</i> | NA24385               | Short             | ABySS<br>2.2.3  | <a href="https://www.bcgsc.ca/downloads/btl/LongStitch/baseline_assemblies/NA24385/abyss/NA24385.abyss.fa.gz">https://www.bcgsc.ca/downloads/btl/LongStitch/baseline_assemblies/NA24385/abyss/NA24385.abyss.fa.gz</a>                           |
| <i>H. sapiens</i> | NA24385               | Long              | Shasta<br>0.5.1 | <a href="https://www.bcgsc.ca/downloads/btl/LongStitch/baseline_assemblies/NA24385/shasta/NA24385.shasta-polished.fa.gz">https://www.bcgsc.ca/downloads/btl/LongStitch/baseline_assemblies/NA24385/shasta/NA24385.shasta-polished.fa.gz</a>     |
| <i>C. elegans</i> | N2                    | Short             | ABySS<br>2.1.4  | <a href="https://www.bcgsc.ca/downloads/btl/LongStitch/baseline_assemblies/celegans/abyss/celegans.abyss.fa.gz">https://www.bcgsc.ca/downloads/btl/LongStitch/baseline_assemblies/celegans/abyss/celegans.abyss.fa.gz</a>                       |
| <i>C. elegans</i> | N2                    | Long              | Shasta<br>0.5.1 | <a href="https://www.bcgsc.ca/downloads/btl/LongStitch/baseline_assemblies/celegans/shasta/celegans.shasta-polished.fa.gz">https://www.bcgsc.ca/downloads/btl/LongStitch/baseline_assemblies/celegans/shasta/celegans.shasta-polished.fa.gz</a> |
| <i>O. sativa</i>  | Japonica<br>group     | Short             | ABySS<br>2.2.3  | <a href="https://www.bcgsc.ca/downloads/btl/LongStitch/baseline_assemblies/osativa/abyss/osativa.abyss.fa.gz">https://www.bcgsc.ca/downloads/btl/LongStitch/baseline_assemblies/osativa/abyss/osativa.abyss.fa.gz</a>                           |
| <i>O. sativa</i>  | Japonica<br>group     | Long              | Canu            | <a href="https://www.ncbi.nlm.nih.gov/assembly/GCA_002573525.1/">https://www.ncbi.nlm.nih.gov/assembly/GCA_002573525.1/</a>                                                                                                                     |

**Table S4. Reference genome builds used for QUASt assembly analysis.**

| Species           | Reference genome build | Reference genome accession |
|-------------------|------------------------|----------------------------|
| <i>H. sapiens</i> | GRCh38                 | GCA_000001405.15           |
| <i>C. elegans</i> | Bristol N2             | GCF_000002985.6            |
| <i>O. sativa</i>  | IRGSP-1.0              | GCF_001433935.1            |

**Table S5. Contiguity, correctness and benchmarking statistics for running the default steps of LongStitch (up to ntLink) on human assemblies.** Default parameters were used, with the exception of the ntLink parameters listed. Misassemblies were assessed using QUASt. ‘n’ is the number of contigs over 3 kbp. The fold increase of extensive misassemblies (as defined by QUASt) is relative to the baseline.

| Individual | Assembler | ntLink parameters | n     | NG50 (Mbp) | NGA50 (Mbp) | Number of extensive misassemblies | Fold increase of extensive misassemblies | Relocations | Inversions | Translocations | Local misassemblies | Time (h) | Peak memory (GB) |
|------------|-----------|-------------------|-------|------------|-------------|-----------------------------------|------------------------------------------|-------------|------------|----------------|---------------------|----------|------------------|
| NA12878    | ABYSS     | k=32, w=100       | 2,521 | 15.32      | 12.19       | 593                               | 1.28                                     | 375         | 25         | 193            | 7,516               | 3.37     | 18.95            |
| NA12878    | Shasta    | k=24, w=250       | 3,126 | 5.70       | 4.68        | 600                               | 1.13                                     | 407         | 27         | 166            | 5,267               | 3.00     | 17.44            |
| NA19240    | ABYSS     | k=40, w=100       | 5,437 | 5.11       | 4.42        | 500                               | 0.52                                     | 212         | 32         | 256            | 961                 | 4.34     | 19.33            |
| NA19240    | Shasta    | k=24, w=250       | 2,571 | 18.66      | 12.93       | 622                               | 1.18                                     | 390         | 35         | 197            | 6,432               | 3.65     | 17.09            |
| NA24385    | ABYSS     | k=40, w=500       | 5,375 | 8.12       | 6.66        | 745                               | 0.37                                     | 415         | 39         | 291            | 1,216               | 4.29     | 22.44            |
| NA24385    | Shasta    | k=40, w=500       | 3,440 | 26.97      | 16.61       | 892                               | 1.16                                     | 588         | 40         | 264            | 4,020               | 4.48     | 19.31            |

**Table S6. Contiguity, correctness and benchmarking statistics for running LRScaf on human assemblies.** Misassemblies were assessed using QUASt. ‘n’ is the number of contigs over 3 kbp. The fold increase of extensive misassemblies is relative to the baseline.

| Individual | Assembler | n     | NG50 (Mbp) | NGA50 (Mbp) | Number of extensive misassemblies | Fold increase of extensive misassemblies | Relocations | Inversions | Translocations | Local misassemblies | Time (h) | Peak memory (GB) |
|------------|-----------|-------|------------|-------------|-----------------------------------|------------------------------------------|-------------|------------|----------------|---------------------|----------|------------------|
| NA12878    | ABYSS     | 2,525 | 11.49      | 8.66        | 1,021                             | 2.21                                     | 581         | 33         | 407            | 8,207               | 2.71     | 21.45            |
| NA12878    | Shasta    | 1,711 | 8.51       | 6.61        | 982                               | 1.84                                     | 654         | 37         | 291            | 5,983               | 3.46     | 18.52            |
| NA19240    | ABYSS     | 3,079 | 3.10       | 1.96        | 1,871                             | 1.93                                     | 560         | 32         | 1,279          | 1,499               | 44.61    | 21.29            |
| NA19240    | Shasta    | 2,068 | 12.40      | 9.48        | 910                               | 1.73                                     | 559         | 42         | 309            | 7,158               | 3.70     | 17.72            |
| NA24385    | ABYSS     | 4,015 | 2.23       | 1.30        | 2,769                             | 1.37                                     | 831         | 56         | 1,882          | 1,245               | 5.89     | 23.54            |
| NA24385    | Shasta    | 3,030 | 24.28      | 16.61       | 1,426                             | 1.86                                     | 859         | 55         | 512            | 4,739               | 13.03    | 19.28            |

**Table S7. Contiguity, correctness and benchmarking statistics for running OPERA-LG on human assemblies.** Misassemblies were assessed using QUASt. ‘n’ is the number of contigs over 3 kbp. The fold increase of extensive misassemblies is relative to the baseline.

| Individual | Assembler | n     | NG50 (Mbp) | NGA50 (Mbp) | Number of extensive misassemblies | Fold increase of extensive misassemblies | Relocations | Inversions | Translocations | Local misassemblies | Time (h) | Peak memory (GB) |
|------------|-----------|-------|------------|-------------|-----------------------------------|------------------------------------------|-------------|------------|----------------|---------------------|----------|------------------|
| NA12878    | ABYSS     | 7,633 | 11.57      | 4.38        | 4,168                             | 9.02                                     | 1,955       | 68         | 2,145          | 8,357               | 226.86   | 284.37           |
| NA12878    | Shasta    | 2,650 | 5.70       | 4.63        | 611                               | 1.15                                     | 416         | 29         | 166            | 5,201               | 273.41   | 290.70           |
| NA19240    | ABYSS     | 6,062 | 1.83       | 0.95        | 3,877                             | 4.00                                     | 1,586       | 49         | 2,242          | 1,721               | 347.78   | 149.26           |
| NA19240    | Shasta    | 3,421 | 3.94       | 3.35        | 636                               | 1.21                                     | 351         | 38         | 247            | 6,467               | 300.75   | 138.88           |
| NA24385    | ABYSS     | 7,332 | 0.95       | 0.57        | 4,970                             | 2.46                                     | 1,865       | 74         | 3,031          | 2,020               | 254.69   | 166.61           |
| NA24385    | Shasta    | 3,904 | 8.20       | 6.57        | 1,169                             | 1.52                                     | 685         | 44         | 440            | 4,129               | 307.16   | 181.04           |

**Table S8. Contiguity, correctness and benchmarking statistics for running LongStitch, LRScaf and OPERA-LG on *C. elegans* assemblies.** Misassemblies were assessed using QUASt. ‘n’ is the number of contigs over 3 kbp. The fold increase of extensive misassemblies is relative to the baseline.

| Tool                      | Assembler | n   | NG50 (kbp) | NGA50 (kbp) | Number of extensive misassemblies | Fold increase of extensive misassemblies | Relocations | Inversions | Translocations | Local misassemblies | Time (min) | Peak memory (GB) |
|---------------------------|-----------|-----|------------|-------------|-----------------------------------|------------------------------------------|-------------|------------|----------------|---------------------|------------|------------------|
| LongStitch (default)      | ABySS     | 936 | 598.70     | 437.23      | 176                               | 0.39                                     | 57          | 30         | 89             | 90                  | 4.27       | 2.65             |
| LongStitch (to ARKS-long) | ABySS     | 756 | 971.83     | 568.50      | 196                               | 0.44                                     | 66          | 38         | 92             | 90                  | 12.02      | 2.65             |
| LRScaf                    | ABySS     | 558 | 390.40     | 247.45      | 499                               | 1.11                                     | 132         | 45         | 322            | 137                 | 2.08       | 4.51             |
| OPERA-LG                  | ABySS     | 523 | 397.34     | 173.89      | 576                               | 1.29                                     | 155         | 47         | 374            | 159                 | 215.55     | 16.24            |
| LongStitch (default)      | Shasta    | 239 | 2,119.26   | 961.86      | 67                                | 0.97                                     | 55          | 5          | 7              | 1,022               | 4.28       | 2.94             |
| LongStitch (to ARKS-long) | Shasta    | 218 | 2,513.58   | 1,139.36    | 79                                | 1.14                                     | 60          | 5          | 14             | 1,040               | 11.35      | 2.94             |
| LRScaf                    | Shasta    | 181 | 2,665.80   | 1,139.36    | 75                                | 1.09                                     | 62          | 6          | 7              | 1,103               | 0.19       | 2.25             |
| OPERA-LG                  | Shasta    | 233 | 1,897.01   | 937.18      | 75                                | 1.09                                     | 60          | 6          | 9              | 1,052               | 407.15     | 15.78            |

- ntLink parameters: ABySS – k=40, w=100; Shasta – k=24, w=250



**Table S9. Contiguity, correctness and benchmarking statistics for running LongStitch, LRScaf and OPERA-LG on *O. sativa* assemblies.** Misassemblies were assessed using QUAST. ‘n’ is the number of contigs over 3 kbp. The fold increase of extensive misassemblies is relative to the baseline.

| Tool                      | Assembler | n     | NG50 (kbp) | NGA50 (kbp) | Number of extensive misassemblies | Fold increase of extensive misassemblies | Relocations | Inversions | Translocations | Local misassemblies | Time (min) | Peak memory (GB) |
|---------------------------|-----------|-------|------------|-------------|-----------------------------------|------------------------------------------|-------------|------------|----------------|---------------------|------------|------------------|
| LongStitch (default)      | ABYSS     | 3,129 | 803.38     | 375.70      | 890                               | 0.63                                     | 402         | 21         | 467            | 1,209               | 24.85      | 4.38             |
| LongStitch (to ARKS-long) | ABYSS     | 2,665 | 1,225.85   | 460.95      | 1,029                             | 0.73                                     | 450         | 59         | 520            | 1,225               | 78.17      | 4.38             |
| LRScaf                    | ABYSS     | 1,863 | 558.98     | 241.39      | 1,967                             | 1.40                                     | 586         | 26         | 1,355          | 1,411               | 24.39      | 11.10            |
| OPERA-LG                  | ABYSS     | 1,557 | 577.14     | 137.03      | 3,224                             | 2.29                                     | 801         | 25         | 2,398          | 1,571               | 973.62     | 24.42            |
| LongStitch (default)      | Canu*     | 790   | 5,899.99   | 1,683.26    | 2,186                             | 0.90                                     | 695         | 54         | 1,437          | 2,649               | 26.03      | 5.28             |
| LongStitch (to ARKS-long) | Canu*     | 763   | 7,377.78   | 1,644.25    | 2,213                             | 0.91                                     | 700         | 54         | 1,459          | 2,651               | 68.26      | 5.28             |
| LRScaf                    | Canu*     | 515   | 3,961.40   | 1,483.04    | 2,542                             | 1.05                                     | 760         | 50         | 1,732          | 2,835               | 14.94      | 4.62             |
| OPERA-LG                  | Canu*     | 507   | 3,426.10   | 1,402.49    | 2,449                             | 1.01                                     | 742         | 49         | 1,658          | 2,711               | 1,826.13   | 39.26            |

\* NCBI accession: GCA\_002573525.1

- ntLink parameters: ABYSS – k=32, w=100; Canu: k=24, w=500

**Table S10. Positive predictive value (PPV) and true positive rate (TPR) of Tigmint-long.** PPV was calculated as corrected misassemblies / total attempted corrections, and TPR was calculated as corrected misassemblies / baseline misassemblies. “Misassemblies” is the sum of extensive and local misassemblies reported by QUAST, and attempted corrections are counted and logged during the Tigmint-cut stage of Tigmint-long.

| Species           | Individual     | Assembler | Number of baseline misassemblies | Number of misassemblies after Tigmint-long | Number of corrected misassemblies | Number of attempted corrections | PPV   | TPR   |
|-------------------|----------------|-----------|----------------------------------|--------------------------------------------|-----------------------------------|---------------------------------|-------|-------|
| <i>H. sapiens</i> | NA12878        | ABySS     | 8,051                            | 7,914                                      | 137                               | 772                             | 0.177 | 0.017 |
| <i>H. sapiens</i> | NA12878        | Shasta    | 5,717                            | 5,523                                      | 194                               | 1,226                           | 0.158 | 0.034 |
| <i>H. sapiens</i> | NA19240        | ABySS     | 1,920                            | 1,269                                      | 651                               | 680                             | 0.957 | 0.339 |
| <i>H. sapiens</i> | NA19240        | Shasta    | 7,042                            | 7,008                                      | 34                                | 64                              | 0.531 | 0.005 |
| <i>H. sapiens</i> | NA24385        | ABySS     | 3,101                            | 1,717                                      | 1,384                             | 1,557                           | 0.889 | 0.446 |
| <i>H. sapiens</i> | NA24385        | Shasta    | 4,822                            | 4,816                                      | 6                                 | 169                             | 0.036 | 0.001 |
| <i>C. elegans</i> | N2 strain      | ABySS     | 533                              | 258                                        | 275                               | 290                             | 0.948 | 0.516 |
| <i>C. elegans</i> | N2 strain      | Shasta    | 1,077                            | 1,072                                      | 5                                 | 24                              | 0.208 | 0.005 |
| <i>O. sativa</i>  | Japonica group | ABySS     | 2,410                            | 1,868                                      | 542                               | 576                             | 0.941 | 0.225 |
| <i>O. sativa</i>  | Japonica group | Canu      | 5,051                            | 4,736                                      | 315                               | 320                             | 0.984 | 0.062 |

**Table S11. Contiguity, correctness and benchmarking statistics for running LongStitch including the optional ARKS-long step on human assemblies.** Default parameters were used, with the exception of the ntLink parameters listed. Misassemblies were assessed using QAST. ‘n’ is the number of contigs over 3 kbp. The fold increase of extensive misassemblies is relative to the baseline.

| Individual | Assembler | ntLink parameters | n     | NG50 (Mbp) | NGA50 (Mbp) | Number of extensive misassemblies | Fold increase of extensive misassemblies | Relocations | Inversions | Translocations | Local misassemblies | Time (h) | Peak memory (GB) |
|------------|-----------|-------------------|-------|------------|-------------|-----------------------------------|------------------------------------------|-------------|------------|----------------|---------------------|----------|------------------|
| NA12878    | ABYSS     | k=32, w=100       | 2,135 | 20.89      | 14.12       | 746                               | 1.61                                     | 488         | 29         | 229            | 7,522               | 6.76     | 18.95            |
| NA12878    | Shasta    | k=24, w=250       | 2,702 | 6.27       | 5.08        | 752                               | 1.41                                     | 499         | 35         | 218            | 5,353               | 6.46     | 17.44            |
| NA19240    | ABYSS     | k=40, w=100       | 4,359 | 10.94      | 6.94        | 626                               | 0.65                                     | 312         | 44         | 270            | 961                 | 9.07     | 19.33            |
| NA19240    | Shasta    | k=24, w=250       | 2,120 | 23.38      | 13.71       | 773                               | 1.47                                     | 470         | 39         | 264            | 6,496               | 8.13     | 17.09            |
| NA24385    | ABYSS     | k=40, w=500       | 4,453 | 13.88      | 9.15        | 1,003                             | 0.50                                     | 570         | 93         | 340            | 1,226               | 9.59     | 22.44            |
| NA24385    | Shasta    | k=40, w=500       | 3,049 | 32.20      | 16.66       | 969                               | 1.26                                     | 638         | 48         | 283            | 4,016               | 9.70     | 19.31            |

**Table S12. Summarizing the number of matching minimizers per ntLink-joined contig pair.**

| Species           | Individual     | Assembly | ntLink parameters | Minimum | 25 <sup>th</sup> percentile | Median | 75 <sup>th</sup> percentile | Maximum |
|-------------------|----------------|----------|-------------------|---------|-----------------------------|--------|-----------------------------|---------|
| <i>H. sapiens</i> | NA12878        | short    | k=32, w=100       | 2       | 5                           | 11     | 25                          | 251     |
| <i>H. sapiens</i> | NA12878        | long     | k=24, w=250       | 2       | 3                           | 9      | 19                          | 136     |
| <i>H. sapiens</i> | NA19240        | short    | k=40, w=100       | 2       | 7                           | 13     | 22                          | 158     |
| <i>H. sapiens</i> | NA19240        | long     | k=24, w=250       | 2       | 4                           | 11     | 19                          | 85      |
| <i>H. sapiens</i> | NA24385        | short    | k=40, w=500       | 2       | 11                          | 20     | 32                          | 169     |
| <i>H. sapiens</i> | NA24385        | long     | k=40, w=500       | 2       | 4                           | 13     | 27                          | 153     |
| <i>C. elegans</i> | N2 strain      | short    | k=40, w=100       | 2       | 5                           | 8      | 14                          | 94      |
| <i>C. elegans</i> | N2 strain      | long     | k=24, w=250       | 2       | 3                           | 7      | 13                          | 69      |
| <i>O. sativa</i>  | Japonica group | short    | k=32, w=100       | 2       | 7                           | 13     | 23                          | 223     |
| <i>O. sativa</i>  | Japonica group | long     | k=24, w=500       | 2       | 3                           | 6      | 9                           | 47      |

## Supplementary Figures

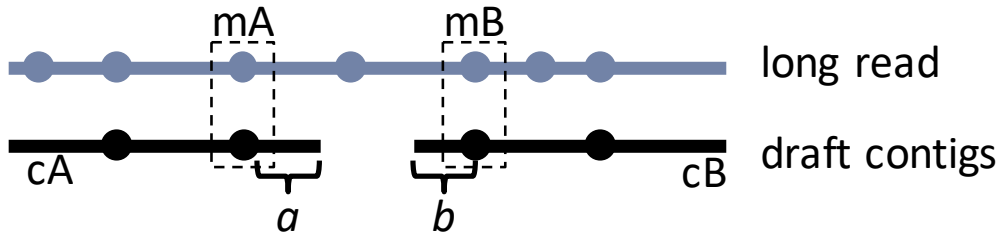

$$\text{gap size} = |\text{pos}(mA, \text{long\_read}) - \text{pos}(mB, \text{long\_read})| - a - b$$

where  $a = \text{distance from } \text{pos}(mA, \text{draft}) \text{ to end of } cA$   
and  $b = \text{distance from } \text{pos}(mB, \text{draft}) \text{ to end of } cB$

**Figure S1. Schematic describing the gap size estimation algorithm in ntLink.**

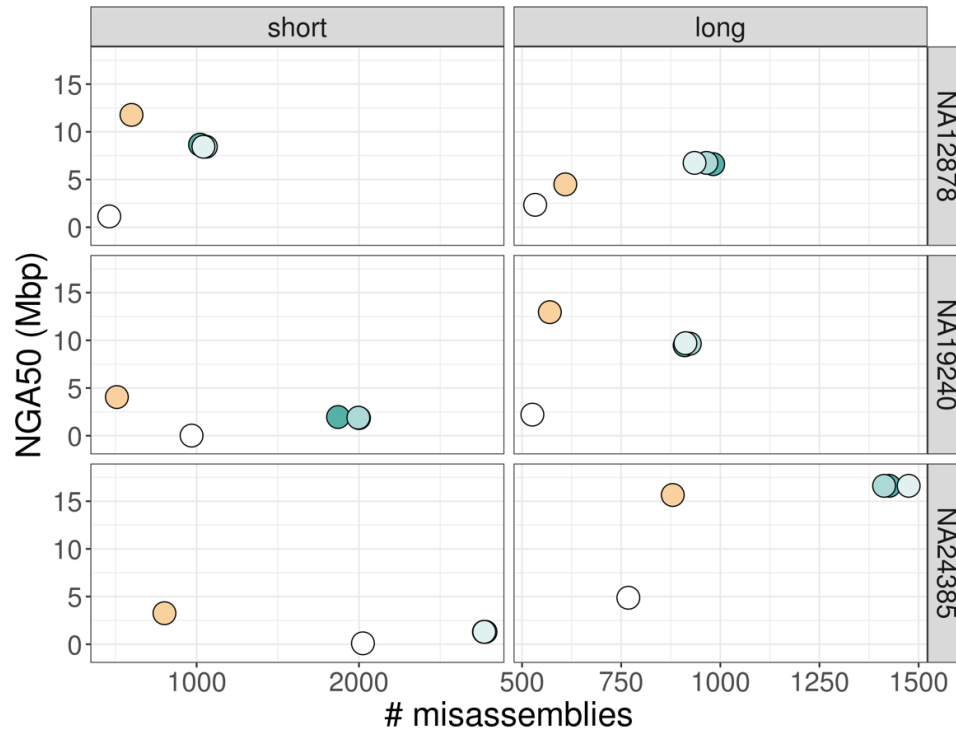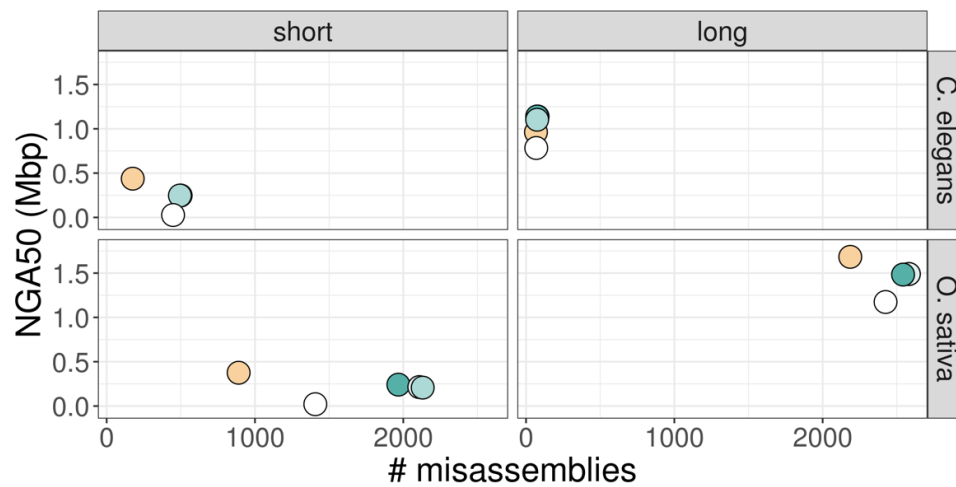

**Tool**

- Baseline
- LongStitch
- LRScaf: minctg1000
- LRScaf: minctg1000\_minoverlap400
- LRScaf: minctg1000\_minoverlap400\_identity0.15\_maxend500

**Figure S2. Contiguity and correctness statistics of assemblies improved using LRScaf with different parameter combinations and LongStitch.** The LRScaf parameters tested are minctg1000: -micl 1000 -i 0.1; minctg1000\_minoverlap400: -micl 1000 -mioll 400 -i 0.1; minctg1000\_minoverlap400\_identity0.15\_maxend500: -micl 1000 -mioll 400 -i 0.15 -mxel 500 -mxohl 500.

**Figure S3. Jupiter consistency plots showing the contiguity and correctness of LongStitch and LRScf assemblies.** Each (A) short-read ABySS assembly and (B) long-read Shasta assembly was improved with LongStitch (default steps) or LRScf, and aligned to the human reference genome (GRCh38). The alignments are plotted as coloured ribbons in each Jupiter plot, with large-scale misassemblies evident as interrupting ribbons.

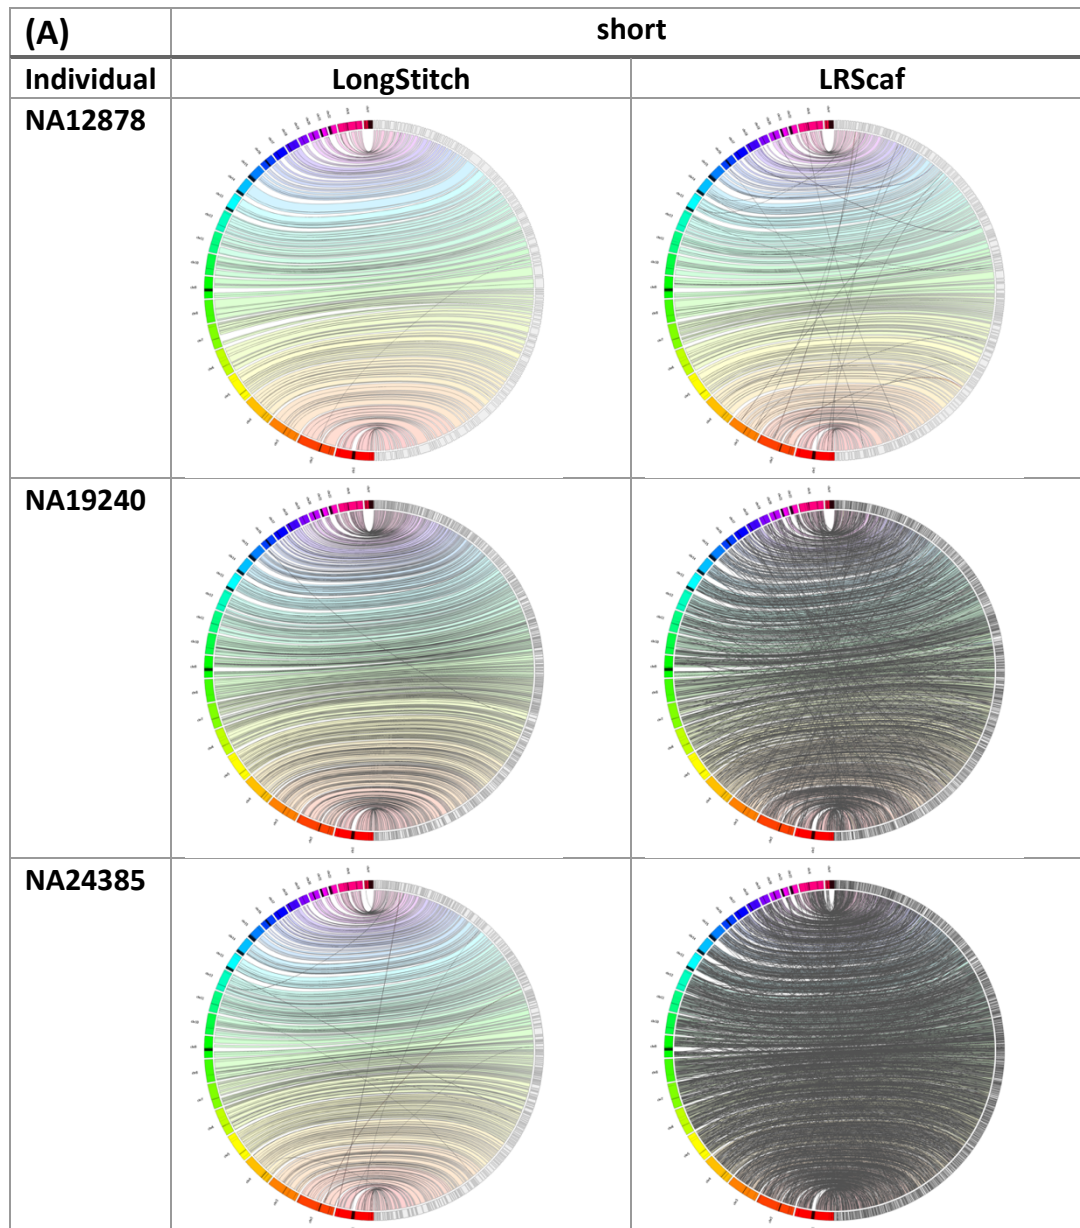

| <b>(B)</b>        | <b>long</b>                                                                         |                                                                                      |
|-------------------|-------------------------------------------------------------------------------------|--------------------------------------------------------------------------------------|
| <b>Individual</b> | <b>LongStitch</b>                                                                   | <b>LRScf</b>                                                                         |
| <b>NA12878</b>    | 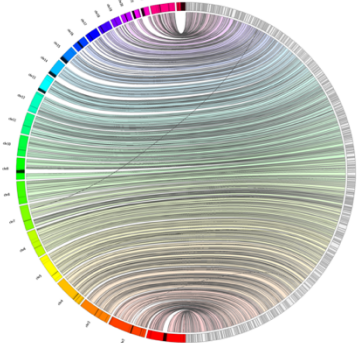   |    |
| <b>NA19240</b>    |   |   |
| <b>NA24385</b>    |  |  |

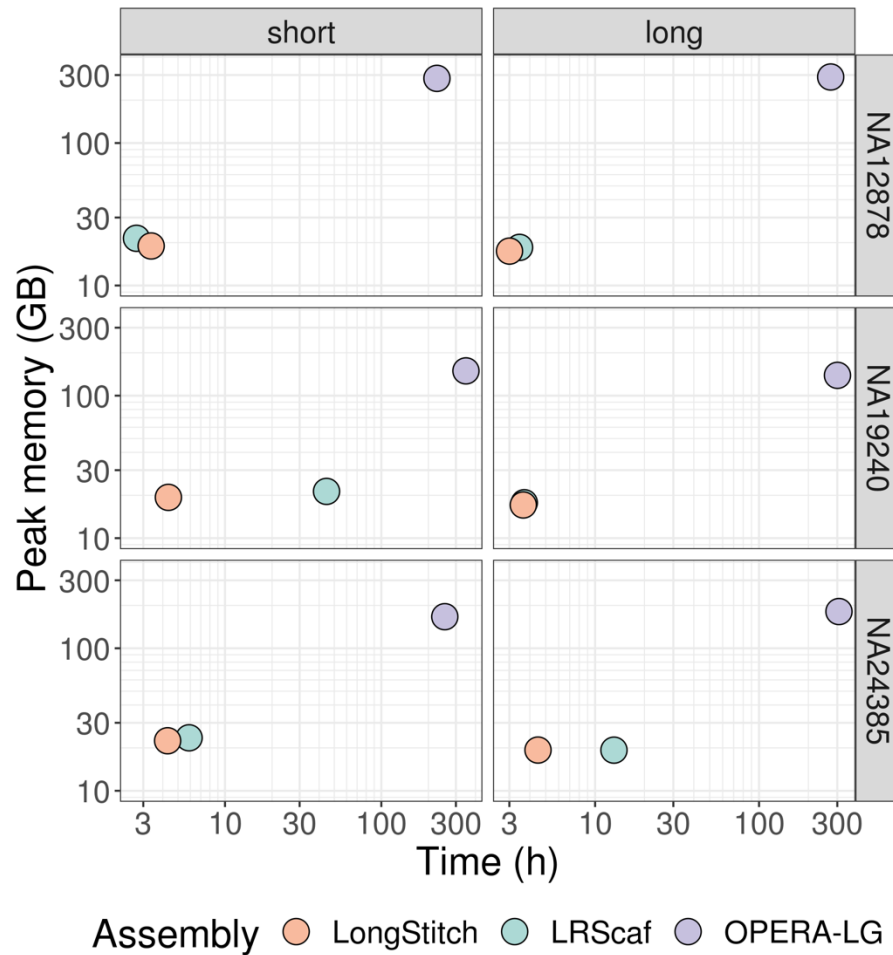

**Figure S4. Benchmarking results of improving assemblies with LongStitch, LRScaf or OPERA-LG.** For three human individuals, NA12878, NA19240 and NA24385, the wall-clock time and peak memory is shown for improving short-read ABySS assemblies and long-read Shasta assemblies using the default steps of LongStitch (up to ntLink) (orange), OPERA-LG (purple) or LRScaf (blue) on a log-log scale.



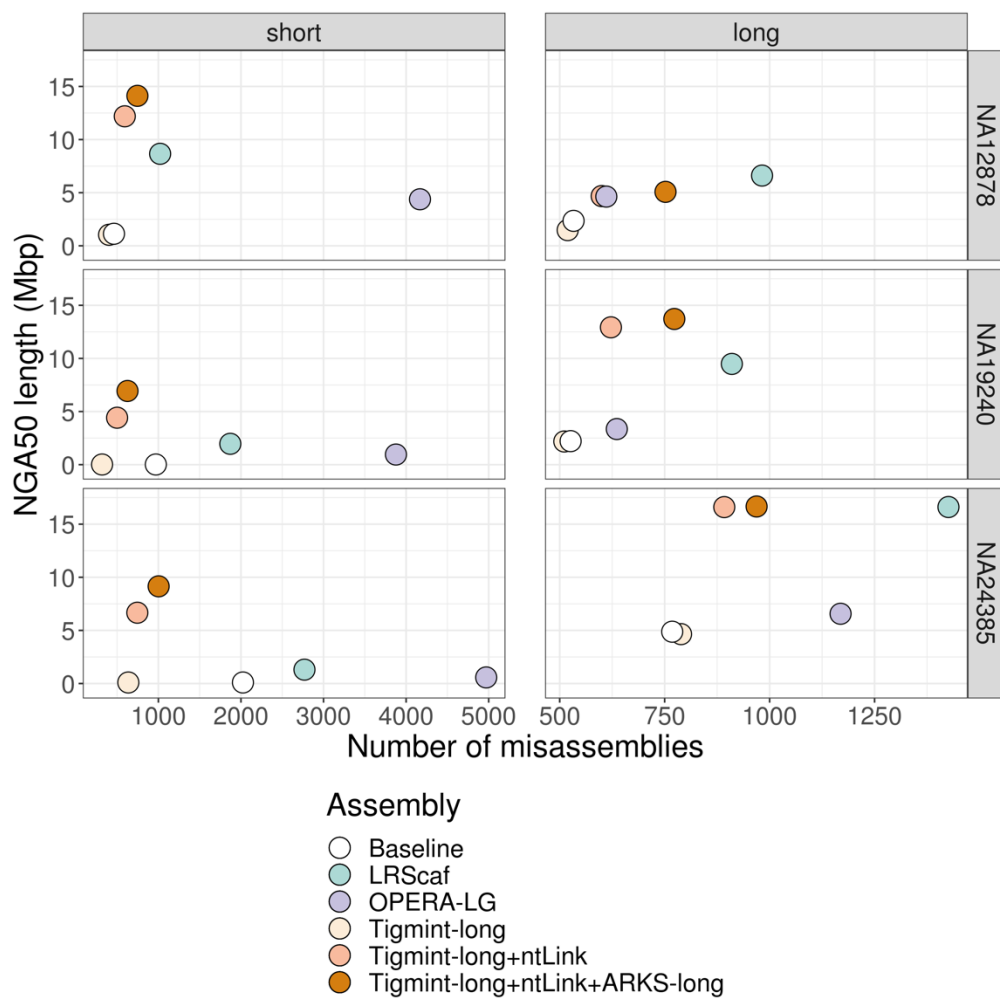

**Figure S5. Contiguity and correctness results for running each step of the LongStitch pipeline, including the optional ARKS-long step, LRScf and OPERA-LG on human assemblies. Each baseline assembly (white) was improved using LongStitch (orange), LRScf (blue) and OPERA-LG (purple).**

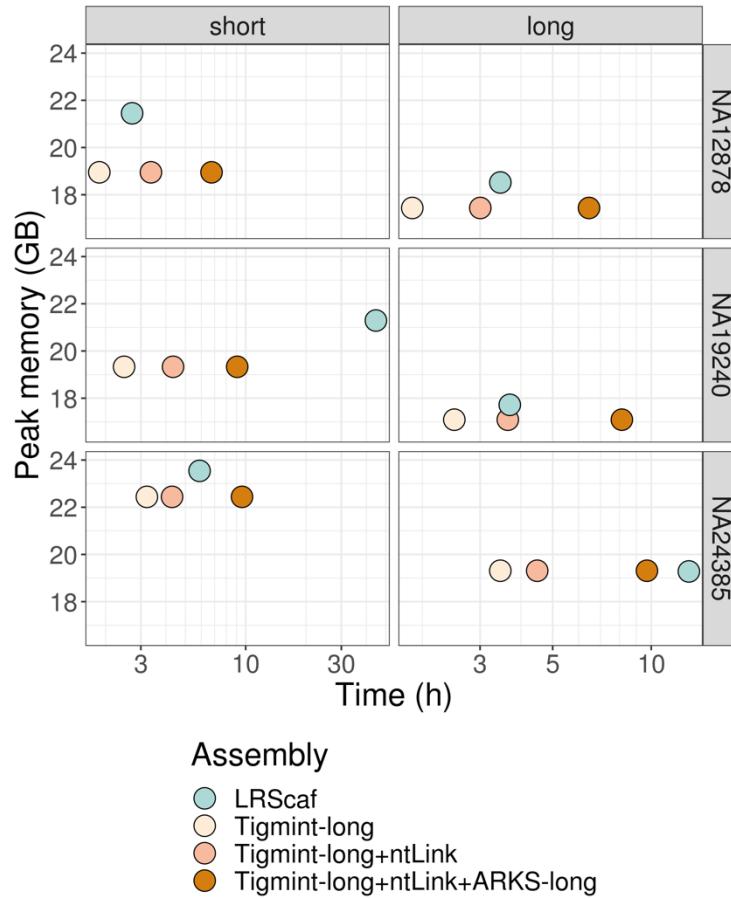

**Figure S6. Benchmarking results for running LRScaf and the LongStitch pipeline including the optional ARKS-long step on human assemblies.** All OPERA-LG runs on human data required over 9 days and 100GB of RAM to complete and are therefore not included in the plots.

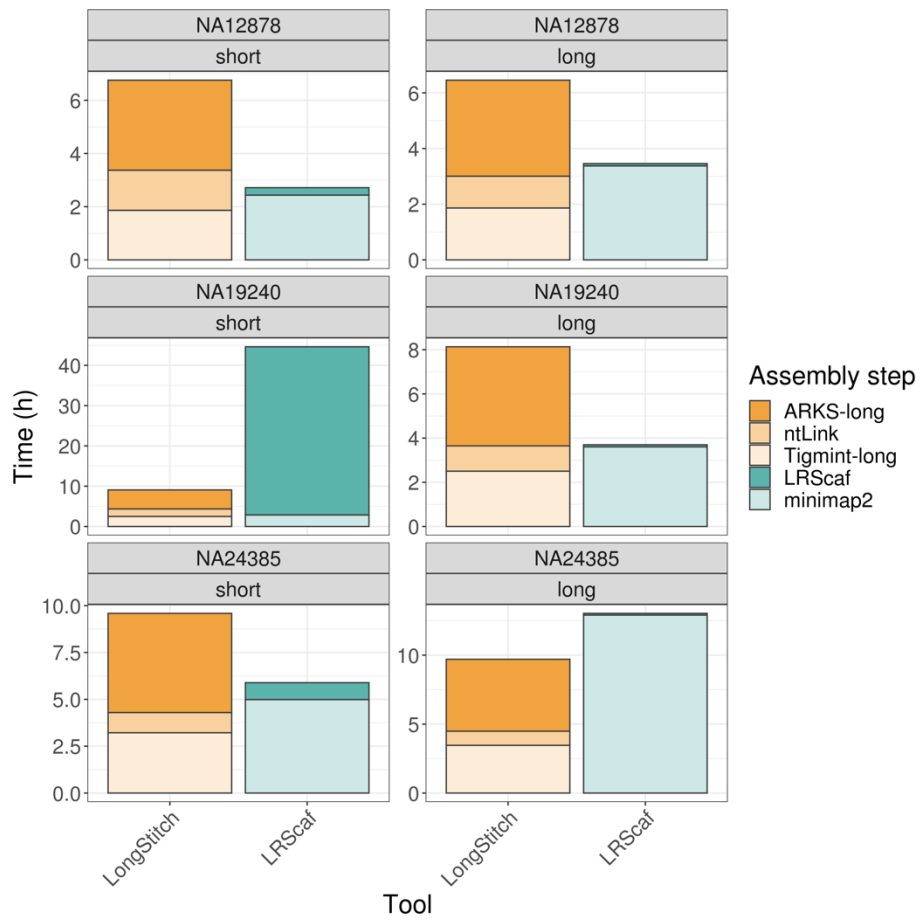

**Figure S7. Time breakdown for each of the steps in LongStitch, including the optional ARKS-long step, and LRScf.** All OPERA-LG runs on human data required over 9 days to complete and therefore are not included in the plots.

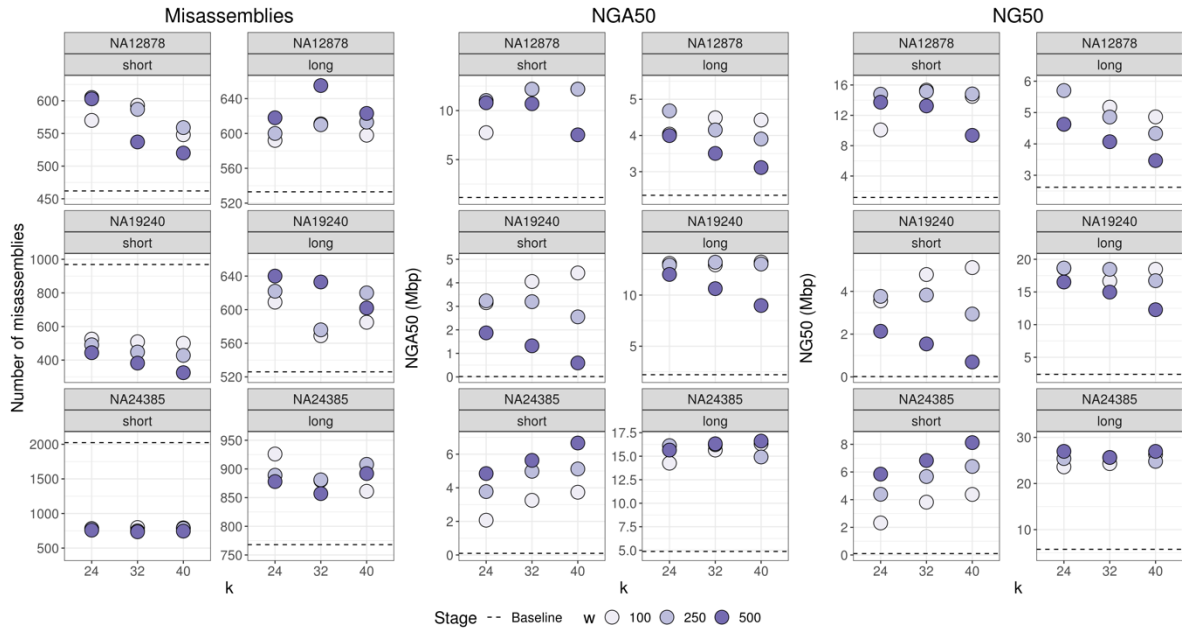

**Figure S8. Contiguity and correctness results from sweeping on the ntLink  $k$  and  $w$  parameters for the default steps of LongStitch. The baseline assembly statistics are indicated with a horizontal dashed line.**

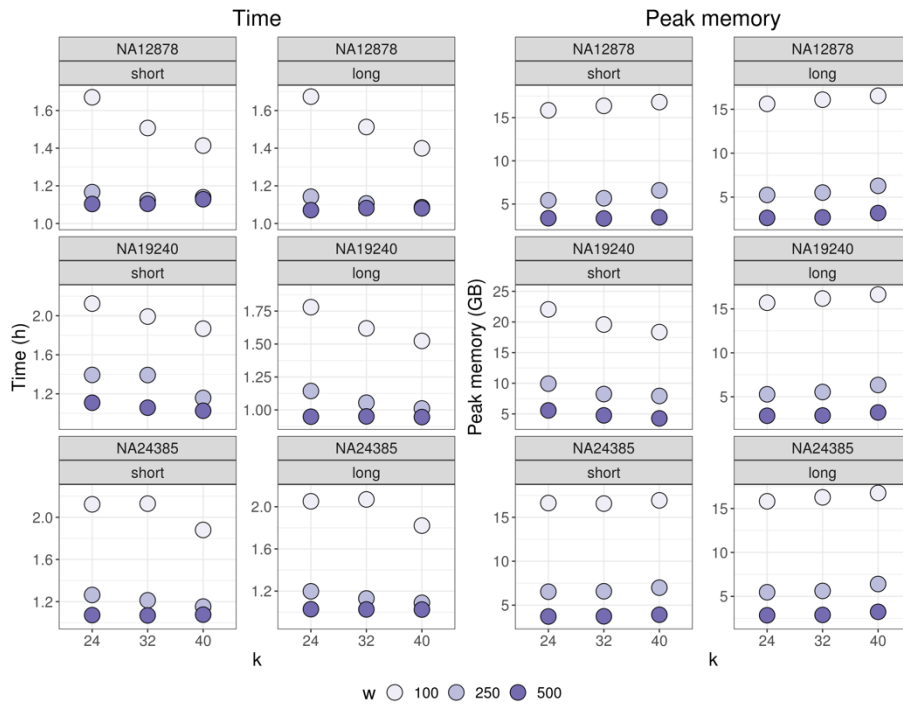

**Figure S9. Benchmarking results from sweeping on the ntLink  $k$  and  $w$  parameters for the default steps of LongStitch.**
